# Supplementary material
Source: publisher site journal article supplement (https://www.dovepress.com/article/558898)
Supplement: Supplementary file 1 [file Supplementary%20Materials.docx]

**Contents:**

1. Supplementary Methods.
2. Supplementary Figure 1: Serum cytokine profiles in the healthy control, GMPP and SMPP groups in all ages.
3. Supplementary Figure 2: Correlation between serum and BALF CCL13 levels in SMPP patients across different age groups.
4. Supplementary Table 1: List of abbreviations for the 50 Cytokines and Chemokines analyzed in this study
5. Supplementary Table 2: Demographic characteristics of MPP patients and healthy controls with serum cytokine detection: stratified by age groups
6. Supplementary Table 3: Demographic characteristics of MPP patients and healthy controls: a larger retrospective cohort study from January 2024 to February 2024
7. Supplementary Table 4: Demographic characteristics of MPP patients with serum cytokine detection: stratified by SARS-Cov-2 IgG level

**Supplementary Methods.**

***Diagnosis of MPP***

The diagnosis of MPP followed the Diagnosis and Treatment of Pediatric MPP Guidelines (2023 version):

- fever or acute respiratory symptoms, or both;
- decreased breath sounds, dry or moist rales;
- chest imaging showing at least one of the following: alveolar inflammatory changes; infiltration shadows;
- positive MP-DNA or RNA, or MP antibody titer ≥4-fold.

***Definition of SMPP***

Severe MPP (SMPP) was defined as MPP with the following conditions:

- persistent high fever;
- appearance of wheezing and shortness of breath;
- peripheral oxygen saturation ≤ 93% while breathing ambient air at rest;
- multilobar or ≥2/3 lung infiltration;
- extrapulmonary complications;
- significantly elevated CRP, LDH, or D-dimer.

***Inclusion criteria of healthy control***

- no respiratory infection symptoms in the past month;
- no MP infection diagnosis in the past six months;
- diagnosed as healthy during the examination.

***Exclusion criteria for all participants***

- no developmental abnormalities and malnutrition;
- no related diseases in the immune system, cardiovascular, liver, kidney, and hematopoietic systems.


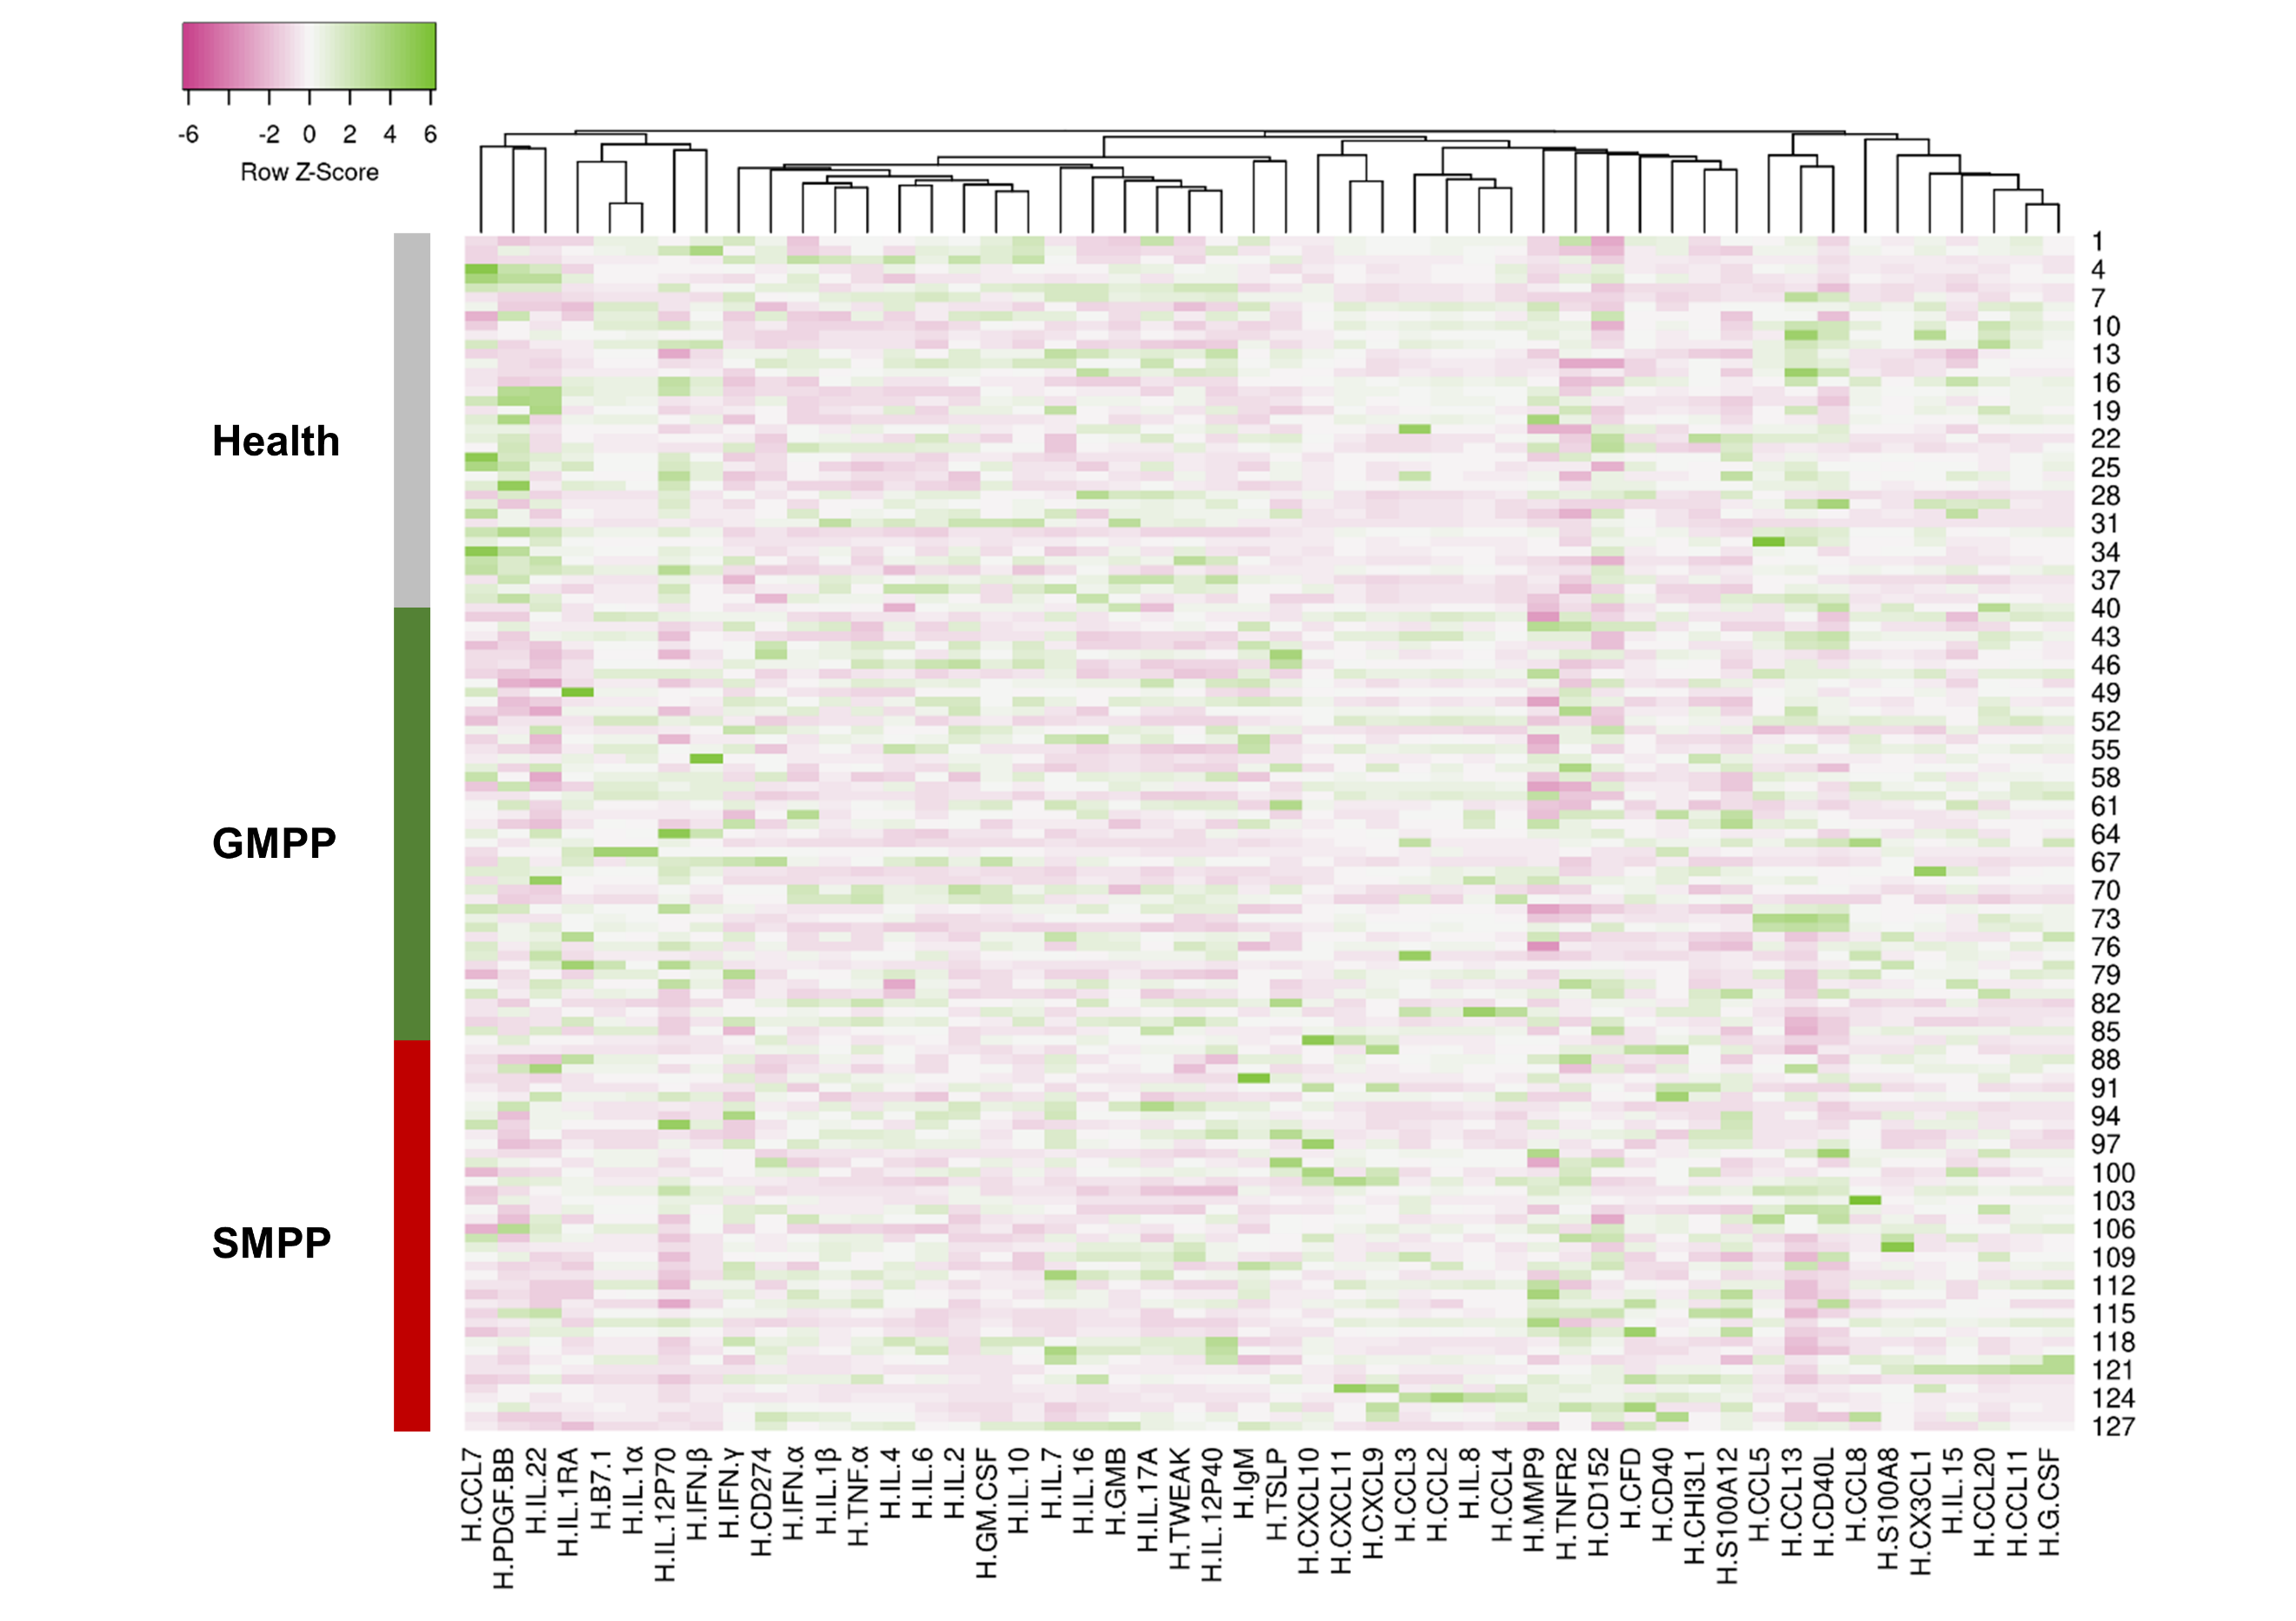
**Supplementary Figure 1: Serum cytokine profiles in the healthy control, GMPP and SMPP groups in all ages.** The cytokines were clustered by statistical analysis between groups.

**Supplementary Figure 2: Correlation between serum and BALF CCL13 levels in SMPP patients across different age groups.** Spearman correlation analysis was performed between paired serum CCL13 concentration (pg/mL) and BALF CCL13 total amount (pg) in SMPP patients. (A) 0-2 years age group, showing no significant correlation (r=0.4, P>0.05). (B) 3-5 years age group, showing no significant correlation (r=-0.1678, P>0.05). (C) 6-12 years age group, showing modest positive correlation (r=0.4610, P=0.0354). Each dot represents one patient, with gray lines connecting paired serum and BALF samples from the same individual. Serum levels are expressed as concentration to reflect systemic cytokine levels, while BALF levels are expressed as total amount to account for variability in saline instillation volume during bronchoalveolar lavage. Only the 6-12 years group demonstrated significant correlation, while all other 49 cytokines showed no significant serum-BALF correlations in any age group (data not shown), indicating compartmentalization of immune responses in SMPP.


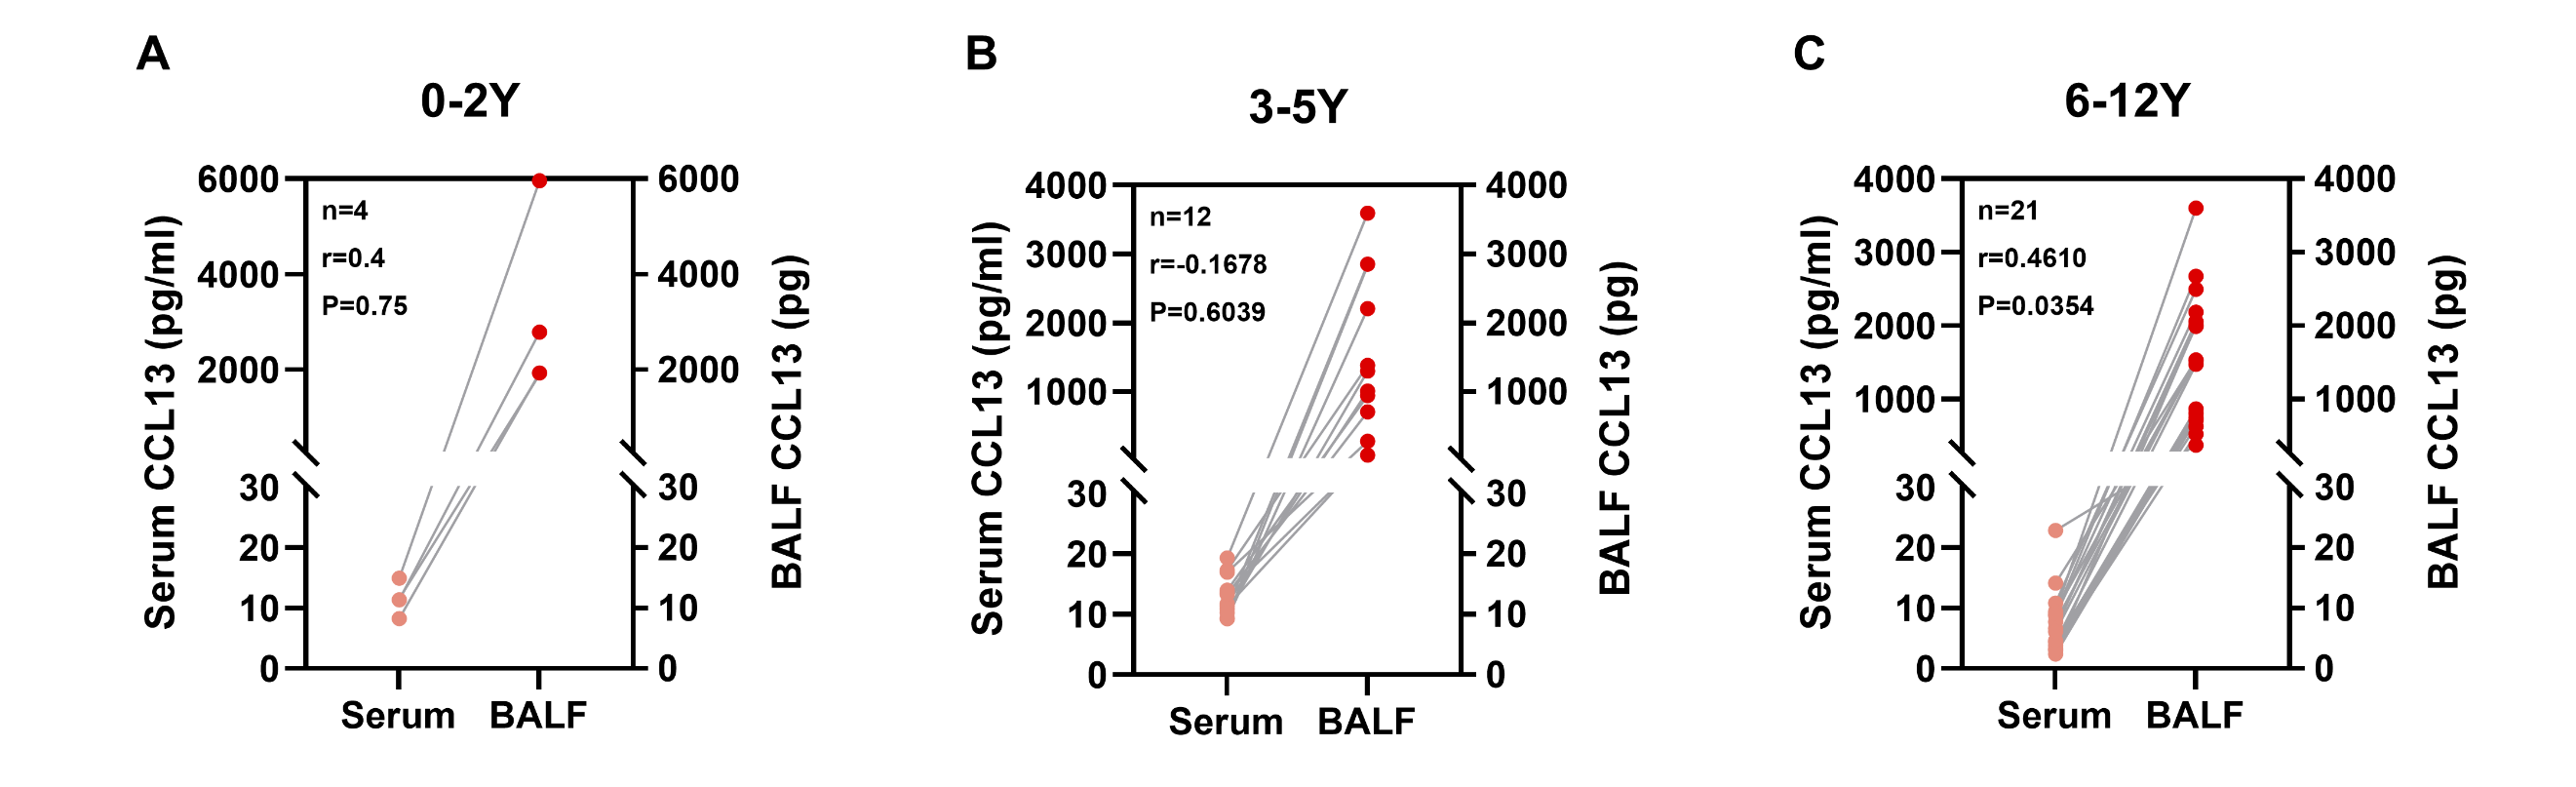


**Supplementary Table 1: List of abbreviations for the 50 Cytokines and Chemokines analyzed in this study**

| **Abbreviation** | **Full Name** | **Alternative Name(s)** |
| --- | --- | --- |
| B7-1 | B7-1 | CD80 |
| CCL2 | C-C Motif Chemokine Ligand 2 | MCP-1, Monocyte Chemoattractant Protein-1 |
| CCL3 | C-C Motif Chemokine Ligand 3 | MIP-1α, Macrophage Inflammatory Protein-1 alpha |
| CCL4 | C-C Motif Chemokine Ligand 4 | MIP-1β, Macrophage Inflammatory Protein-1 beta |
| CCL5 | C-C Motif Chemokine Ligand 5 | RANTES |
| CCL7 | C-C Motif Chemokine Ligand 7 | MCP-3, Monocyte Chemoattractant Protein-3 |
| CCL8 | C-C Motif Chemokine Ligand 8 | MCP-2, Monocyte Chemoattractant Protein-2 |
| CCL11 | C-C Motif Chemokine Ligand 11 | Eotaxin |
| CCL13 | C-C Motif Chemokine Ligand 13 | MCP-4, Monocyte Chemoattractant Protein-4 |
| CCL20 | C-C Motif Chemokine Ligand 20 | MIP-3α, Macrophage Inflammatory Protein-3 alpha |
| CD40 | Cluster of Differentiation 40 | TNFRSF5 |
| CD40L | CD40 Ligand | CD154, TNFSF5 |
| CD152 | Cluster of Differentiation 152 | CTLA-4, Cytotoxic T-Lymphocyte-Associated Protein 4 |
| CD274 | Cluster of Differentiation 274 | PD-L1, Programmed Death-Ligand 1 |
| CFD | Complement Factor D | Adipsin |
| CHI3L1 | Chitinase-3-Like Protein 1 | YKL-40 |
| CX3CL1 | C-X3-C Motif Chemokine Ligand 1 | Fractalkine |
| CXCL9 | C-X-C Motif Chemokine Ligand 9 | MIG, Monokine Induced by Gamma Interferon |
| CXCL10 | C-X-C Motif Chemokine Ligand 10 | IP-10, Interferon gamma-Induced Protein 10 |
| CXCL11 | C-X-C Motif Chemokine Ligand 11 | I-TAC, Interferon-inducible T-cell Alpha Chemoattractant |
| G-CSF | Granulocyte Colony-Stimulating Factor | CSF3 |
| GM-CSF | Granulocyte-Macrophage Colony-Stimulating Factor | CSF2 |
| GMB | Granulin B | — |
| IFN-α | Interferon-alpha | Type I Interferon |
| IFN-β | Interferon-beta | Type I Interferon |
| IFN-γ | Interferon-gamma | Type II Interferon |
| IgM | Immunoglobulin M | — |
| IL-1α | Interleukin-1 alpha | — |
| IL-1β | Interleukin-1 beta | — |
| IL-1RA | Interleukin-1 Receptor Antagonist | IL-1Ra, Anakinra |

| **Abbreviation** | **Full Name** | **Alternative Name(s)** |
| --- | --- | --- |
| IL-2 | Interleukin-2 | — |
| IL-4 | Interleukin-4 | — |
| IL-6 | Interleukin-6 | — |
| IL-7 | Interleukin-7 | — |
| IL-8 | Interleukin-8 | CXCL8 |
| IL-10 | Interleukin-10 | — |
| IL-12P40 | Interleukin-12 p40 subunit | IL-12B |
| IL-12P70 | Interleukin-12 p70 | IL-12 (bioactive heterodimer) |
| IL-15 | Interleukin-15 | — |
| IL-16 | Interleukin-16 | — |
| IL-17A | Interleukin-17A | — |
| IL-22 | Interleukin-22 | — |
| MMP9 | Matrix Metalloproteinase-9 | Gelatinase B |
| PDGF-BB | Platelet-Derived Growth Factor-BB | — |
| S100A8 | S100 Calcium-Binding Protein A8 | Calgranulin A, MRP8 |
| S100A12 | S100 Calcium-Binding Protein A12 | Calgranulin C, EN-RAGE |
| TNF-α | Tumor Necrosis Factor-alpha | TNF |
| TNFR2 | Tumor Necrosis Factor Receptor 2 | TNFRSF1B, CD120b |
| TSLP | Thymic Stromal Lymphopoietin | — |
| TWEAK | TNF-related Weak Inducer of Apoptosis | TNFSF12 |

**Supplementary Table 1. (Continued)**

This table lists all 50 human cytokines and chemokines measured in the current study using ABplex Human 50-Plex Custom Panel. Abbreviations are presented in alphabetical order for ease of reference. Alternative names include commonly used synonyms, systematic nomenclature (*e.g.*, CD numbers, chemokine ligand designations), and clinical names where applicable. Dashes (—) indicate no widely recognized alternative names.

**Supplementary Table 2: Demographic characteristics of MPP patients and healthy controls with serum cytokine detection: stratified by age groups**

|  | **0-2Y** | | | | **3-5Y** | | | | **6-12Y** | | | |
| --- | --- | --- | --- | --- | --- | --- | --- | --- | --- | --- | --- | --- |
|  | **Health** | **GMPP** | **SMPP** | **p-value** | **Health** | **GMPP** | **SMPP** | **p-value** | **Health** | **GMPP** | **SMPP** | **p-value** |
|  | **(n=10)** | **（n=12）** | **（n=5）** |  | **(n=10)** | **(n=12)** | **(n=12)** |  | **(n=20)** | **(n=23)** | **(n=23)** |  |
| **Age** | 2.17 (1.19, 2.5) | 2.5 (2.21, 2.75) | 2.33 (2.13, 2.42) | 0.24 | 4.75±0.39 | 4.56±0.35 | 4.67±0.48 | 0.57 | 7.90±1.90 | 7.84±1.51 | 8.37±1.43 | 0.49 |
| **Male [N(%)]** | 7(70) | 6(50) | 3(60) | 0.78 | 8(80) | 6(50) | 8(66.67) | 0.36 | 13(65) | 8(34.78) | 14(60.87) | 0.11 |
| **Weight [Kg]** | 12.15±2.64 | 12.58±4.14 | 12.46±1.47 | 0.95 | 18.20±1.72 | 16.83±1.83 | 17.41±2.03 | 0.25 | 27.04±8.55 | 26.37±6.48 | 27.25±9.47 | 0.93 |

Normally distributed data were showed as mean ± standard deviation, while non-normally distributed data were presented as median (IQR, 25th-75th percentiles). For normally distributed variables, Ordinary One-way ANOVA was employed to compare group differences, whereas the Kruskal-Wallis test was used for non-normally distributed variables. Chi-square test or Fisher's exact test was performed for classified variables. P-value < 0.05 was defined as statistically significant.

**Supplementary Table 3: Demographic characteristics of MPP patients and healthy controls: a larger retrospective cohort study from January 2024 to February 2024**

|  | **0-2Y** | | | | **3-5Y** | | | | **6-12Y** | | | |
| --- | --- | --- | --- | --- | --- | --- | --- | --- | --- | --- | --- | --- |
|  | **Health** | **GMPP** | **SMPP** | **p-value** | **Health** | **GMPP** | **SMPP** | **p-value** | **Health** | **GMPP** | **SMPP** | **p-value** |
|  | **(n=20)** | **（n=12）** | **（n=5）** |  | **(n=22)** | **(n=30)** | **(n=18)** |  | **(n=84)** | **(n=75)** | **(n=66)** |  |
| **Age** | 2.17  (1.58, 2.46) | 2.5  (2.21, 2.75) | 2.33  (2.13, 2.42) | 0.23 | 5.19±0.40 | 5.04±0.61 | 4.86±0.57 | 0.16 | 8 (7.02-9.54) | 8 (7.08-9.5) | 8.5 (7.31-9.58) | 0.4573 |
| **Male [N(%)]** | 11(55) | 6(50) | 3(60) | 0.99 | 6 (27.27) | 16 (53.33) | 11 (61.11) | 0.07 | 59 (70.23) | 37 (49.33) | 30 (45.46) | 0.0034** |

Normally distributed data were showed as mean ± standard deviation, while non-normally distributed data were presented as median (IQR, 25th-75th percentiles). For normally distributed variables, Ordinary One-way ANOVA was employed to compare group differences, whereas the Kruskal-Wallis test was used for non-normally distributed variables. Chi-square test or Fisher's exact test was performed for classified variables. P-value < 0.05 was defined as statistically significant, **, P < 0.01.

**Supplementary Table 4: Demographic characteristics of MPP patients with serum cytokine detection: stratified by SARS-Cov-2 IgG level**

|  | **0-2Y** | |  | **3-5Y** | |  | | **6-12Y** | |  | |
| --- | --- | --- | --- | --- | --- | --- | --- | --- | --- | --- | --- |
|  | **IgG-** | **IgG+** | **p-value** | **IgG-** | **IgG+** | | **p-value** | **IgG-** | **IgG+** | | **p-value** |
|  | **（n=10）** | **（n=7）** |  | **(n=14)** | **(n=10)** | |  | **(n=18)** | **(n=28)** | |  |
| **Age** | 2.46 (2.33, 2.75) | 2.25 (2, 2.5) | 0.43 | 4.49±0.39 | 4.79±0.40 | | 0.08 | 8.43±1.59 | 7.90±1.39 | | 0.17 |
| **Male [N(%)]** | 5 (50.00) | 4 (57.14) | 0.99 | 9 (64.27) | 5 (50.00) | | 0.68 | 12 (66.67) | 10 (35.71) | | 0.07 |

Normally distributed data were showed as mean ± standard deviation, while non-normally distributed data were presented as median (IQR, 25th-75th percentiles). For normally distributed variables, Ordinary One-way ANOVA was employed to compare group differences, whereas the Kruskal-Wallis test was used for non-normally distributed variables. Chi-square test or Fisher's exact test was performed for classified variables. P-value < 0.05 was defined as statistically significant.
